# Supplementary figures and images for: Cost-effectiveness of a hypertension management programme in an elderly population: a Markov model
Source: Springer Nature journal article supplement (doi:10.1186/1478-7547-9-4), 2011-01-01

**A B**


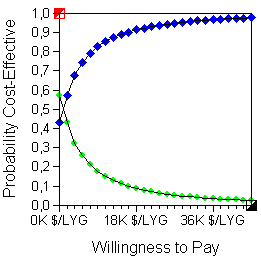

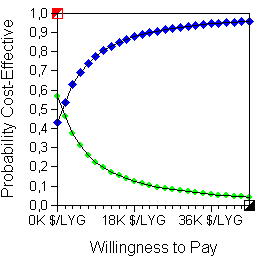


**C D**


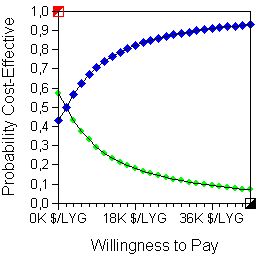

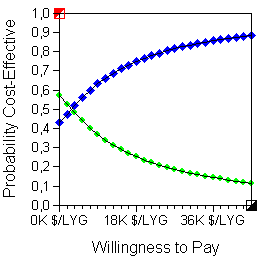

Supplement: Additional file 2 [file 1478-7547-9-4-s2.doc]
